# Supplementary material for: Nematode–Microbe Complexes in Soils Replanted with Apple
Source: MDPI journal article supplement (doi:10.3390/microorganisms10010157), 2022-01-12

# Supplement

## Nematode-microbe complexes in soils replanted with apple

Xorla Kanfra<sup>1</sup>, Andreas Wrede<sup>2</sup>, Julia Moll<sup>3</sup>, Holger Heuer<sup>1\*</sup>

<sup>1</sup> Institute for Epidemiology and Pathogen Diagnostics, Julius Kühn Institute (JKI) - Federal Research Centre for Cultivated Plants, Braunschweig, Germany

<sup>2</sup> Department of Horticulture, Landwirtschaftskammer Schleswig-Holstein, Ellerhoop, Germany

<sup>3</sup> Department of Soil Ecology, Helmholtz Centre for Environmental Research - UFZ, Halle (Saale), Germany

**\*Correspondence:**

Dr. Holger Heuer

holger.heuer@julius-kuehn.de

# 1 Supplementary Table

**Supplementary Table S1** The effect of the treatment (replanted vs. control) or sampling on the relative abundances of major nematode orders and phyla of the nematode-associated microbes. Statistical analysis was done using a two-way analysis of variance (ANOVA) for sampling and treatment.

| Community                    | Order             | Factor sampling<br>(E2, E3, H1, H4) |         |         | Factor replanting<br>(ARD- vs. control plot) |         |         |
|------------------------------|-------------------|-------------------------------------|---------|---------|----------------------------------------------|---------|---------|
|                              |                   | DF                                  | F-value | P-value | DF                                           | F-value | P-value |
| Nematodes                    | Araeolaimida      | 3                                   | 12.68   | <0.001  | 1                                            | 5.81    | 0.018   |
|                              | Chromadorida      | 3                                   | 28.18   | <0.001  | 1                                            | 0.86    | 0.357   |
|                              | Diplogasterida    | 3                                   | 16.94   | <0.001  | 1                                            | 4.04    | 0.047   |
|                              | Dorylaimida       | 3                                   | 3.41    | 0.021   | 1                                            | 4.13    | 0.045   |
|                              | Enoplida          | 3                                   | 0.42    | 0.738   | 1                                            | 1.28    | 0.262   |
|                              | Mermithida        | 3                                   | 1.24    | 0.301   | 1                                            | 7.89    | 0.006   |
|                              | Monhysterida      | 3                                   | 1.87    | 0.141   | 1                                            | 0.00    | 0.980   |
|                              | Mononchida        | 3                                   | 6.79    | <0.001  | 1                                            | 9.89    | 0.002   |
|                              | Rhabditida        | 3                                   | 20.12   | <0.001  | 1                                            | 20.72   | <0.001  |
|                              | Trichocephalida   | 3                                   | 3.12    | 0.030   | 1                                            | 0.01    | 0.938   |
|                              | Triplonchida      | 3                                   | 41.75   | <0.001  | 1                                            | 0.15    | 0.696   |
|                              | Tylenchida        | 3                                   | 22.73   | <0.001  | 1                                            | 22.16   | <0.001  |
| Nematode-associated fungi    | Ascomycota        | 3                                   | 26.51   | <0.001  | 1                                            | 1.49    | 0.226   |
|                              | Basidiomycota     | 3                                   | 29.90   | <0.001  | 1                                            | 0.93    | 0.337   |
|                              | Chytridiomycota   | 3                                   | 11.04   | <0.001  | 1                                            | 6.98    | 0.010   |
|                              | Glomeromycota     | 3                                   | 3.96    | 0.011   | 1                                            | 0.00    | 0.955   |
|                              | Mortierellomycota | 3                                   | 22.13   | <0.001  | 1                                            | 2.85    | 0.095   |
|                              | Rozellomycota     | 3                                   | 11.25   | <0.001  | 1                                            | 8.80    | 0.004   |
|                              | Unidentified      | 3                                   | 0.62    | 0.6048  | 1                                            | 0.44    | 0.507   |
| Nematode-associated bacteria | Proteobacteria    | 3                                   | 28.12   | <0.001  | 1                                            | 2.01    | 0.159   |
|                              | Bacteroidetes     | 3                                   | 16.53   | <0.001  | 1                                            | 2.16    | 0.145   |
|                              | unclassified      | 3                                   | 7.92    | <0.001  | 1                                            | 5.59    | 0.020   |
|                              | Actinobacteria    | 3                                   | 39.54   | <0.001  | 1                                            | 0.00    | 0.999   |
|                              | Acidobacteria     | 3                                   | 24.92   | <0.001  | 1                                            | 9.01    | 0.003   |
|                              | Firmicutes        | 3                                   | 10.06   | <0.001  | 1                                            | 11.75   | <0.001  |
|                              | Verrucomicrobia   | 3                                   | 10.35   | <0.001  | 1                                            | 13.65   | <0.001  |
|                              | Saccharibacteria  | 3                                   | 9.96    | <0.001  | 1                                            | 2.21    | 0.141   |
|                              | Chloroflexi       | 3                                   | 11.80   | 0.013   | 1                                            | 0.85    | 0.358   |
|                              | Nitrospirae       | 3                                   | 8.65    | <0.001  | 1                                            | 0.05    | 3.941   |

Degrees of freedom is denoted as DF.  $P < 0.05$  indicates significant differences.

## 2 Supplementary Figures

**Supplementary Figure S1.** Root fresh mass of apple plants in response to ARD or healthy soils in the two reference sites Ellerhoop (E) and Heidgraben (H) measured during the 3<sup>rd</sup> and 4<sup>th</sup> sampling respectively. The line inside the box represents the median and the dots represent the samples (n=12). Significant differences are revealed by Tukey's test compared within each soil separately.

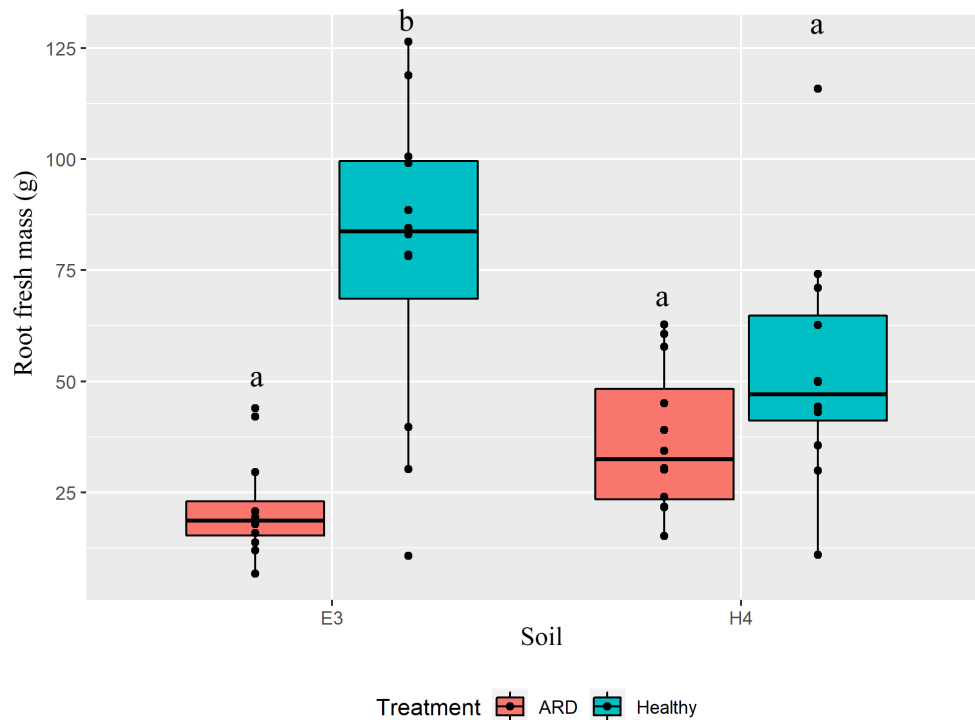

**Supplementary Figure S2.** Taxonomic profiles of nematode communities across all samplings in replanted plots and control plots (ARD / Healthy). The average relative abundances are shown on the order level. Taxa with less than 0.5% relative abundance were grouped as rare.

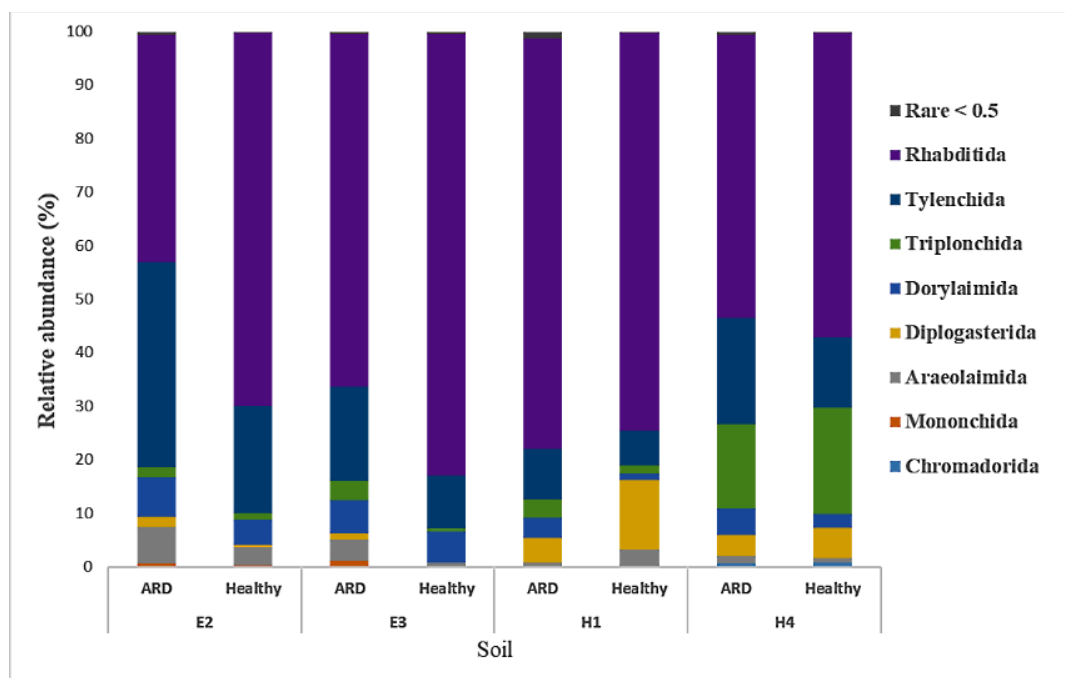

**Supplementary Figure S3.** Taxonomic profiles of nematode-associated fungal communities across all samplings in replanted plots and control plots (ARD / Healthy). The average relative abundances are shown on the phylum level. Taxa with less than 0.5% relative abundance were grouped as rare.

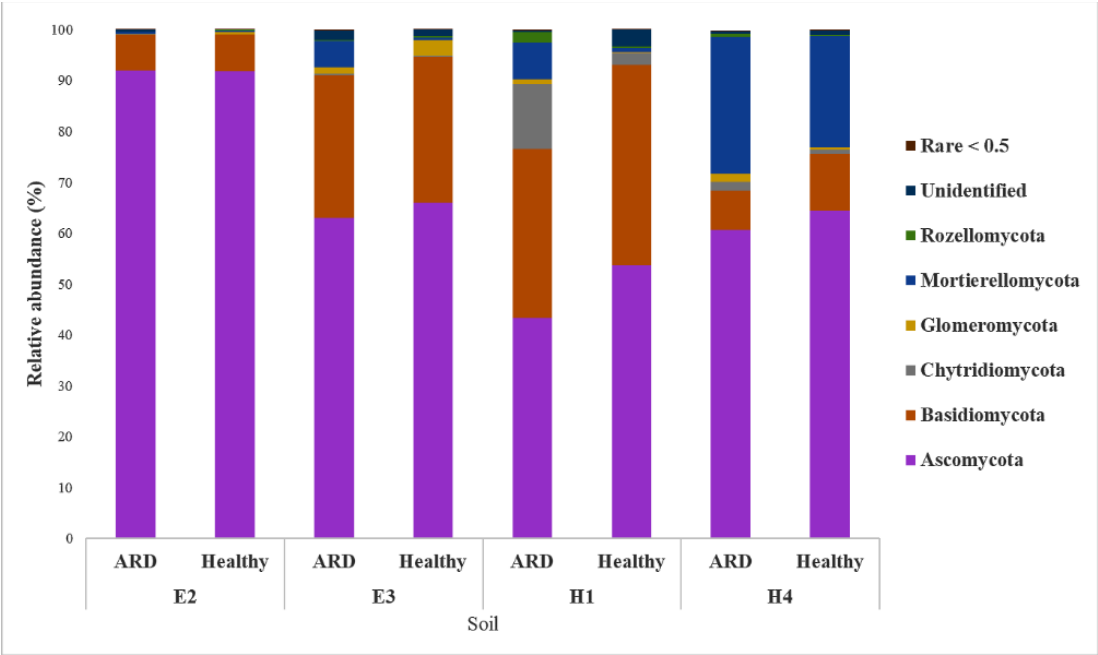

**Supplementary Figure S4.** Taxonomic profiles of nematode-associated bacteria communities across all samplings in replanted plots and control plots (ARD / Healthy). The average relative abundances are shown on the phylum level. Taxa with less than 0.5% relative abundance were grouped as rare.

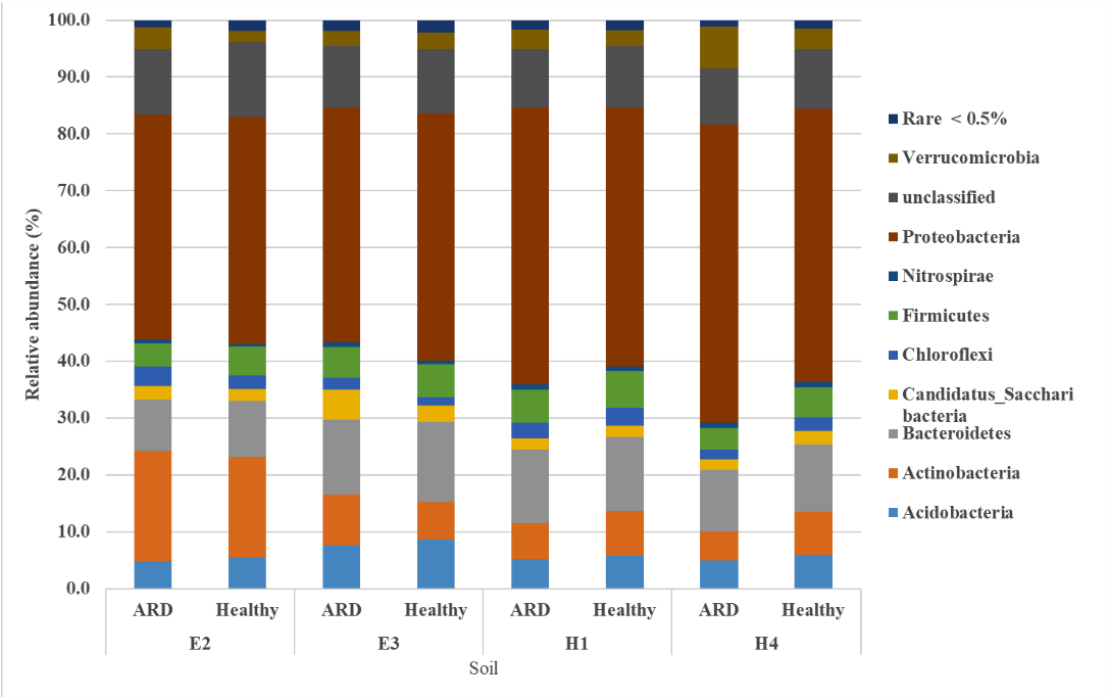

Supplement: s1 [file s1]
